# Supplementary material for: A retrospective study on safety and clinical outcomes of unilateral biportal endoscopic technique for spinal degenerative diseases
Source: PeerJ. 2025 Apr 3;13:e19076. doi: 10.7717/peerj.19076 (PMC11972562; doi:10.7717/peerj.19076)
Supplement: Supplemental Information 1 [file peerj-13-19076-s001.xlsx]

## Sheet: Sheet1
No.	ID	Admission	Discharge	Hospital stay(D)	Follow-up(m)	Symptom duration(y)	Age	Gender	PBV	Weight	Height	BMI	Diagnosis	Surgical method	Surgical segments	surgical level	Surgical time(min)	Pos-immoblization time(d)	Duration of drainage(d)	intra-BL(ml)	Pos-BL(ml)	PBV	TBL	HBL	Pre-JOA	Pos-JOA(1y)	Improvement rate(%)-1y	Pre-ODI-Back(%)	Pos-ODI-Back-1m	Pos-ODI-Back-3m	Pos-ODI-Back-1y	Pre-ODI-Leg	Pos-ODI-leg-1m	Pos-ODI-leg-3m	Pos-ODI-leg-1y	Pre-VAS-Back	Pos-VAS-Back-1m	Pos-VAS-Back-3m	Pos-VAS-Back-1y	Pre-VAS-Leg	Pos-VAS-Leg-1m	Pos-VAS-Leg-3m	Pos-VAS-Leg-1y	Pre-CK	Pos-CK1	Pos-CK2	Pos-CK3	Pre-CRP	Pos-CRP1
1	0090843	20230606	20230610	4	14	1	76	F	3295.69	54	1.55	22.4766	LDH	percutaneous lumbar discectomy+laminectomy+syndesmectomy	1	L4/5	80	1.16	1	50	60							45	35	22	15	42	35	22	15	6	5	2	1	5	4	3	1	11	89			0.26	1.21
7	0203847	20230614	20230623	9	14	0.16	58	F	3864.15	68	1.59	26.8977	LDH	percutaneous lumbar discectomy+laminectomy+syndesmectomy	1	L4/5	93	2	2	50	15							57	38	15	10	35	21	12	5	6	5	2	1	5	2	1	1	33	42			0.2	3.25
8	0771797	20230524	20230605	12	15	30	79	F	3572.67	60	1.58	24.0346	LDH	percutaneous lumbar discectomy+laminectomy+syndesmectomy	2	L3/4,L4/5	165	2	2	100	20							63	41	29	23	47	29	16	16	7	5	4	3	6	4	2	2	110	239			9.69	88.11
10	6911938	20230602	20230609	7	12	3	43	F	3904.24	65	1.64	24.1672	LDH	percutaneous lumbar discectomy+laminectomy+syndesmectomy	1	L5/S1	95	1	1	15	50							48	32	19	15	22	16	9	6	6	2	1	1	4	2	1	1	113	218			3.17	7.89
11	3334409	20230602	20230608	6	16	0.5	31	F	4557.85	83	1.66	30.1205	LDH	percutaneous lumbar discectomy+laminectomy+syndesmectomy	1	L5/S1	100	1	1	15	60							41	24	10	5	21	14	6	3	6	2	1	1	4	2	1	1	76	167			0.77	6.78
12	0710656	20230602	20230610	8	13	17	67	F	3553.08	61	1.56	25.0657	LDH+spinal stenosis	percutaneous lumbar discectomy+laminectomy+syndesmectomy	2	L4/5,L5/S1	155	1	1	20	50							57	35	29	17	40	30	18	16	7	5	4	3	6	4	2	1	80	189			0.52	1.82
14	0662495	20230518	20230524	6	12	10	40	F	3692.65	66	1.55	27.4714	LDH	percutaneous lumbar discectomy+laminectomy+syndesmectomy	1	L5/S1	100	1	1	100	20							54	41	27	18	39	21	14	10	6	5	3	2	5	3	2	2	123	225			0.2	12.67
15	9101061	20230519	20230605	16	13	5	69	F	3720.37	62	1.61	23.9188	LDH	percutaneous lumbar discectomy+laminectomy+syndesmectomy	1	L4/5	122	2	1	20	30							46	33	19	15	30	22	19	15	6	4	2	1	5	3	1	1	90	125	89		1	15.67
16	0662532	20230519	20230529	10	15	6	77	F	3930.31	70	1.59	27.6888	LDH	percutaneous lumbar discectomy+laminectomy+syndesmectomy	1	L4/5	102	2	2	10	30							53	34	22	14	32	21	16	7	6	5	4	3	5	2	2	1	45	58	29		3.65	7.94
18	0720983	20230523	20230526	3	13	0.08	61	F	4018.09	71	1.61	27.3909	LDH	percutaneous lumbar discectomy+laminectomy+syndesmectomy	1	L4/5	117	2	2	20	40							55	41	32	21	35	18	16	10	6	5	3	2	5	2	1	1	100	134			1.57	2.48
28	3334293	20230424	20230504	10	17	0.02	60	F	3908.76	66	1.63	24.841	LDH	percutaneous lumbar discectomy+laminectomy+syndesmectomy	1	L4/5	100	2	2	20	30							43	31	22	16	31	23	16	10	6	5	2	2	5	3	2	2	74	197			0.33	10.23
31	6916380	20230415	20230419	4	13	0.08	51	F	3354.6	55	1.56	22.6003	LDH	percutaneous lumbar discectomy+laminectomy+syndesmectomy	2	L2/3,L4/5	112	2	1	50	30							41	24	16	4	22	13	6	4	5	3	2	1	3	1	1	1	67	189			0.3	0.42
32	2123568	20230414	20230421	7	12	0.25	57	F	4617.44	83	1.68	29.4076	LDH	laminectomy+syndesmectomy	2	L4/5,L5/S1	190	1	1	80	50							67	43	22	16	53	31	16	7	7	5	2	1	6	4	2	1	51	136			2.04	6.5
34	6916263	20230330	20230410	10	16	3	55	F	3463.05	58	1.56353	23.7255	LDH+spinal stenosis	laminectomy+syndesmectomy	2	L3/4,L4/5	200	4	4	100	30							58	37	23	16	39	25	14	6	6	3	1	1	5	3	1	1	80	138			3.25	7.68
36	1322257	202300320	20230401	12	14	5	65	F	3455.73	54	1.61	20.8325	LDH+spinal stenosis	percutaneous lumbar discectomy+laminectomy+syndesmectomy	1	L4/5	108	3	2	50	30							53	34	22	14	32	21	16	7	6	3	2	1	5	2	1	1	117	130			7.35	4.06
40	1328513	20230216	20230226	10	14	20	58	F	3847.47	65	1.62	24.7676	LDH	percutaneous lumbar discectomy+laminectomy+syndesmectomy	1	L1/2	105	3	1	50	30							45	36	20	15	36	23	10	10	6	4	2	1	5	3	2	1	37	198	89		4.02	10.87
41	0660555	20230205	20230216	11	14	5	65	F	3308.03	52	1.58	20.83	LDH	percutaneous lumbar discectomy+laminectomy+syndesmectomy	1	L4/5	101	1	1	20	20							42	33	14	6	35	15	8	5	6	3	1	1	5	2	1	1	99	213	84		0.4	3.5
45	0659473	20221128	20221207	9	14	0.08	66	F	3229.53	52	1.55	21.6441	LDH	laminectomy+syndesmectomy	1	L5/S1	104	3	1	50	30							49	27	14	6	19	10	8	5	6	4	2	1	5	3	1	1	68	163	72		0.27	0.29
46	0750097	20221108	20221114	6	14	3	30	F	3376.85	54	1.581	21.6038	LDH	percutaneous lumbar discectomy+laminectomy+syndesmectomy+Annulus fibrosus suture	1	L5/S1	136	1	1	20	25							44	24	12	4	17	8	6	3	5	4	3	1	4	2	2	1	92	178	95		2	16
49	6914986	20221120	20221126	6	13	10	70	F	3772.95	59	1.66306	21.3322	LDH	percutaneous lumbar discectomy+laminectomy+syndesmectomy	1	L5/S1	112	1	1	20	25							59	44	28	14	37	26	14	10	5	3	1	1	4	2	1	1	163	317	201		4	18
50	1436544	20221121	20221126	5	13	10	39	F	3500.61	58	1.57779	23.2987	LDH	percutaneous lumbar discectomy+laminectomy+syndesmectomy	1	L4/5	113	0.5	0.5	30	25							58	42	23	12	31	25	13	5	6	4	1	1	3	1	1	1	50	167	64		2	11
51	6915048	20221121	20221127	6	13	0.16	50	F	3738.84	60	1.64	22.3081	LDH	percutaneous lumbar discectomy+laminectomy+syndesmectomy	1	L5/S1	114	1	1	30	25							57	49	27	10	28	15	10	6	6	3	1	1	4	1	1	1	84	189	90		1	17
52	6914066	20221021	20221107	12	13	0.5	74	F	4098.55	70	1.65	25.7117	LDH	percutaneous lumbar discectomy+laminectomy+syndesmectomy	2	L4/5,L5/S1	156	3	1	50	30							61	46	20	16	32	19	9	6	6	3	1	1	5	2	1	1	189	137	92	69	2	5
54	6914704	20221025	20221106	9	13	10	69	F	3677.2	59	1.63	22.2063	LDH	percutaneous lumbar discectomy+laminectomy+syndesmectomy	2	L1/2,L5/S1	152	3	2	100	30							55	44	28	15	37	19	10	7	6	3	1	1	4	2	1	1	30	101	27		1	2
55	0545248	20221016	20221030	10	13	1	59	F	3682.07	60	1.62	22.8624	LDH	percutaneous lumbar discectomy+laminectomy+syndesmectomy	1	L4/5	110	2	1	20	10							62	51	35	17	39	26	17	11	6	4	2	1	4	1	1	1	45	38			1	9
56	1414972	20221019	20221028	9	13	5	55	F	3539.59	59	1.58	23.634	LDH	percutaneous lumbar discectomy+laminectomy+syndesmectomy	1	L4/5	122	1	1	50	15							67	47	19	8	32	13	8	3	6	2	1	1	5	3	1	1	71	198	98		1	10
58	6913653	20220927	20221010	10	13	5	75	F	2972.47	45	1.54	18.9745	LDH+spinal stenosis	percutaneous lumbar discectomy+laminectomy+syndesmectomy	3	L3/4,L4/5,L5/S1	235	2	1	50	90							63	47	28	12	33	21	14	8	7	5	3	1	4	2	1	1	63	167	49		1	25
63	0658128	20220916	20221002	12	14	9	59	F	4293.21	75	1.66	27.2173	LDH+spinal stenosis	laminectomy+syndesmectomy	2	L3/4,L4/5	200	2	1	20	20							59	45	26	12	38	30	19	10	6	4	2	1	6	3	1	1	123	349	223		2	13
64	6910766	20220920	20220927	5	13	0.08	47	F	4271.34	75	1.65254	27.4637	LDH+spinal stenosis	laminectomy+syndesmectomy	1	L5/S1	167	1	1	20	20							55	38	19	9	31	20	12	6	7	5	2	1	5	2	1	1	55	176	90		4	10
66	6913821	20220829	20220906	5	12	20	65	F	3473.43	57	1.58	22.8329	spinal stenosis	laminectomy+syndesmectomy	1	L5/S1	111	1	1	10	20							51	41	22	10	39	21	11	8	7	5	2	1	6	3	1	1	104	212	116		1	10
69	0777013	20220824	20220830	5	12	5	59	F	4458.61	80	1.66	29.0318	LDH	percutaneous lumbar discectomy+laminectomy+syndesmectomy	1	L4/5	113	1	1.5	10	20							44	33	22	11	32	21	14	9	6	3	1	1	7	4	2	1	97	194			4	13
70	0775782	20220825	20220910	9	12	6	73	F	3308.03	52	1.58	20.83	LDH	percutaneous lumbar discectomy+laminectomy+syndesmectomy	2	L3/4,L4/5	136	1	1	20	15							51	42	26	15	45	34	22	14	5	3	2	2	6	4	2	1	270	118			1	22
71	0775693	20220717	20220801	14	12	0.33	68	F	3900.07	64	1.65	23.5078	LDH	percutaneous lumbar discectomy+laminectomy+syndesmectomy	1	L4/5	114	1	1	20	30							67	39	18	10	43	31	17	15	7	4	3	2	6	5	4	2	79	216			1	5
74	0645000	20220609	20220617	7	12	5	51	F	3738.84	60	1.64	22.3081	LDH	percutaneous lumbar discectomy+laminectomy+syndesmectomy	1	L5/S1	90	0.5	0.5	50	20							48	33	18	6	41	29	17	8	6	4	2	1	5	2	1	1	90	213	121		12	26
78	1399556	20220621	20220630	9	12	0.16	72	F	3142.63	47	1.58	18.8271	L5 isthmic spondylolisthesis	UBE-PLIF+discectomy	1	L4/5	330	1.5	1.5	100	70							53	39	26	12	38	29	18	8	7	6	3	1	6	4	2	1	55	589	219	167	1	7
84	6912188	20220426	20220505	9	14	0.08	41	F	3929.33	64	1.66	23.2254	LDH	percutaneous lumbar discectomy+laminectomy+syndesmectomy	1	L5/S1	110	1.4	0.6	30	10							40	31	17	8	20	10	8	5	5	3	1	1	4	2	1	1	40	168			2	29
85	0240955	20220425	20220505	10	14	0.04	46	F	3904.24	65	1.64	24.1672	LDH	percutaneous lumbar discectomy+laminectomy+syndesmectomy	1	L4/5	124	1.6	1.6	20	50							37	24	12	4	26	14	9	6	4	3	1	1	4	3	1	1	88	225	188		4	21
89	0618085	20220207	20220215	8	16	0.16	68	F	3715.15	61	1.62	23.2434	LDH	percutaneous lumbar discectomy+laminectomy+syndesmectomy	2	L4/5,L5/S1	189	2.2	1.5	60	10							42	28	20	16	43	34	26	14	5	3	2	1	6	4	3	2	61	998	534	187	4	25
92	1357337	20220228	20220309	9	15	0.5	38	F	4250.81	71	1.69	24.8591	LDH	percutaneous lumbar discectomy+laminectomy+syndesmectomy	1	L4/5	260	3.6	2	20	40							51	42	28	12	28	15	10	6	6	4	3	2	4	2	2	1	81	212	144	32	7	42
98	0649826	20211222	20220103	12	17	0.5	34	F	3819.61	65	1.61	25.0762	LDH	percutaneous lumbar discectomy+laminectomy+syndesmectomy	1	L5/S1	120	2	1.5	50	20							43	37	29	16	37	24	16	5	6	5	4	2	5	3	1	1	84				2
99	0238810	20211205	20211218	13	18	0.02	45	F	3453.84	58	1.56	23.833	LDH	percutaneous lumbar discectomy+laminectomy+syndesmectomy	1	L5/S1	165	3	1	20	30							73	49	36	17	43	27	18	12	8	4	3	1	6	4	3	1	45				5	23
2	6917342	20230606	20230610	4	14	3	73	M	4531.22	66	1.7	22.8374	LDH+spinal stenosis	percutaneous lumbar discectomy+laminectomy+syndesmectomy	1	L4/5	85	1	1	50	50							50	38	24	17	43	31	23	18	6	4	2	1	5	4	2	1	100	178			0.38	1.02
3	0662071	20230612	20230621	9	13	5.5	60	M	4984.7	75	1.75	24.4898	LDH	percutaneous lumbar discectomy+laminectomy+syndesmectomy	1	L4/5	96	1.04	1	65	50							55	40	25	18	44	30	28	22	6	4	2	1	5	4	3	2	72	128	102	64	0.88	1.39
4	6917465	20230612	20230618	6	15	5	63	M	5145.65	80	1.75	26.1224	LDH+spinal stenosis	percutaneous lumbar discectomy+laminectomy+syndesmectomy	1	L4/5	92	3	2	30	25							48	33	24	12	33	21	10	9	6	4	2	2	5	2	1	1	106	203			0.75	1.49
5	6917466	20230612	20230617	5	13	3	66	M	4306.46	60	1.69	21.0077	LDH+spinal stenosis	percutaneous lumbar discectomy+laminectomy+syndesmectomy	1	L4/5	89	3	2	30	25							59	45	28	12	38	26	12	10	6	5	4	3	5	4	2	1	78	190			1.89	7.24
6	1392271	20230614	20230625	11	12	0.33	42	M	5572.44	81	1.86	23.4131	LDH	percutaneous lumbar discectomy+laminectomy+syndesmectomy+Annulus fibrosus suture	1	L4/5	110	2	2	20	20							40	30	12	7	18	16	8	3	6	3	1	1	5	2	1	1	343	497			0.24	6.89
9	0660523	20230531	20230610	10	13	30	69	M	5251.41	79	1.79	24.6559	LDH	percutaneous lumbar discectomy+laminectomy+syndesmectomy	2	L4/5,L5/S1	160	2	1	200	40							64	43	31	22	49	28	18	16	7	5	4	3	6	5	4	2	47	139			3.61	10.23
13	0662453	20230516	20230531	15	14	3	68	M	4402.46	62	1.7	21.4533	LDH	percutaneous lumbar discectomy+laminectomy+syndesmectomy	2	L4/5,L5/S1	156	2	1	20	40							46	32	16	10	42	22	13	7	6	4	2	1	6	2	1	1	62	129			0.45	2.1
17	2904055	20230517	20230524	7	16	10	57	M	4693.67	67	1.74	22.1297	RLDH	laminectomy+syndesmectomy	2	L3/4,L4/5	135	2	2	50	20							47	30	20	14	31	17	10	7	6	5	2	1	5	2	1	1	53	109
19	2301426	20230512	20230608	26	14	1	22	M	5275.03	77	1.81461	23.3842	LDH	percutaneous lumbar discectomy+laminectomy+syndesmectomy	1	L5/S1	101	1	1	100	20							47	32+AB21	16	8	13	10	6	5	6	4	2	1	5	2	1	1	102	141			2.81	3.28
20	1429342	20230508	20230516	8	14	5	76	M	4578.14	67	1.70462	23.058	LDH	percutaneous lumbar discectomy+laminectomy+syndesmectomy	2	L3/4,L4/5	125	2	2	10	70							49	36	21	15	35	27	14	8	6	5	2	1	5	4	2	1	36	160			2.38	6.67
21	238722	20230509	20230530	21	13	0.5	20	M	4469.66	59	1.75	19.2653	LDH	percutaneous lumbar discectomy+laminectomy+syndesmectomy+Annulus fibrosus suture	1	L5/S1	113	2	2	10	15							42	29	10	7	21	10	6	5	6	2	1	1	4	2	1	1	95	165			0.1	2.23
22	0392182	20230426	20230507	11	12	3	64	M	5184.15	78	1.78	24.6181	LDH+spinal stenosis	laminectomy+syndesmectomy	1	L4/5	112	2	2	50	20							60	41	22	14	54	22	10	6	7	4	2	2	6	2	1	1	167	199			9.92	5.56
23	0244541	20230503	20230508	5	13	10	68	M	4081.13	53	1.69	18.5568	LDH+spinal stenosis	percutaneous lumbar discectomy+laminectomy+syndesmectomy	2	L3/4,L4/5	167	2	2	50	20							55	31	17	10	38	19	15	8	6	4	2	1	6	3	1	1	70	112			0.09	0.35
24	1393318	20230508	202300517	9	14	3	73	M	4436.15	65	1.68	23.03	LDH+spinal stenosis	laminectomy+syndesmectomy	1	L4/5	102	2	2	200	40							43	32	25	17	34	18	15	10	6	3	1	1	5	3	3	2	89	49			1.04	1.06
25	0641759	202300417	20230429	12	16	8	65	M	4025.12	56	1.64	20.8209	LDH	percutaneous lumbar discectomy+laminectomy+syndesmectomy	1	L5/S1	110	2	1	20	50							74	55	35	29	53	40	21	18	7	6	5	3	6	3	2	2	254	154			0.02	2.05
26	0781364	20230417	20230424	7	16	0.17	28	M	5842.56	87	1.88	24.6152	cervical spondylotic radiculopathy	percutaneous cervical discectomy+laminectomy+syndesmectomy	1	C4/5	210	1	1	40	25				14	15																		128	220			0.35	1.95
27	0602864	20230418	20230424	6	15	5	69	M	4308.7	62	1.67	22.231	LDH	percutaneous lumbar discectomy+laminectomy+syndesmectomy	1	L4/5	120	2	2	50	70							58	36	27	14	32	21	15	9	6	4	2	1	5	3	2	1	93	137			0.23	0.42
29	3334295	202300425	20230501	6	16	10	73	M	4820.74	74	1.71	25.3069	LDH	percutaneous lumbar discectomy+laminectomy+syndesmectomy	2	L3/4,L4/5	220	2	2	30	20							52	38	26	18	38	21	14	11	7	6	4	3	5	3	2	2	67	199			0.34	11.22
30	2301633	20230412	20230422	10	15	1	23	M	5147.37	79	1.76	25.5036	LDH	percutaneous lumbar discectomy+laminectomy+syndesmectomy	1	L5/S1	121	2	1	50	20							47	25	13	9	35	14	6	5	6	3	1	1	4	1	1	1	208	195	114		1.35	2.45
33	0781127	20230326	20230401	5	13	0.125	48	M	4724.35	70	1.72	23.6614	LDH	percutaneous lumbar discectomy+laminectomy+syndesmectomy	2	L4/5,L5/S1	135	2	1	40	50							91	21	10	6	87	16	6	5	9	3	1	1	8	2	1	1	203	147			0.55	3.36
35	0711885	20230403	20200412	9	15	13	65	M	4757.1	70	1.73	23.3887	LDH+spinal stenosis	laminectomy+syndesmectomy	3	L3/4,L4/5,L5/S1	254	1	1	70	40							77	57	38	20	23	16	9	6	8	5	3	2	5	3	1	1	58	124			3.86	14.28
37	1421545	20230323	20230405	14	13	5	32	M	4854.62	72	1.74	23.7812	LDH	percutaneous lumbar discectomy+laminectomy+syndesmectomy+Annulus fibrosus suture	1	L4/5	102	3	3	20	30							52	31	17	8	28	18	9	6	6	4	1	1	4	1	1	1	107	172	120		0.91	9.32
38	0059031	20230220	20230310	18	15	0.25	57	M	5435.36	84	1.7965	26.0271	LDH	percutaneous lumbar discectomy+laminectomy+syndesmectomy	2	L3/4,L4/5	156	3	2	20	80							62	39	22	12	26	13	9	6	7	4	2	1	4	1	1	1	55	319			0.38	2.23
39	2903316	20230223	20230302	7	15	0.67	27	M	4338.08	60	1.7	20.7612	LDH	percutaneous lumbar discectomy+laminectomy+syndesmectomy	1	L5/S1	128	1	1	30	30							47	32	19	4	32	20	14	6	6	3	1	1	5	2	1	1	51	178			0.29	2.39
42	6915588	20230206	20230211	5	13	0.08	50	M	5151.96	77	1.78	24.3025	LDH	percutaneous lumbar discectomy+laminectomy+syndesmectomy+Annulus fibrosus suture	1	L4/5	100	1	1	30	20							70	42	25	16	28	19	10	6	8	5	2	1	4	2	1	1	149	276	121		0.6	1.97
43	0633253	20221210	20111226	14	13	1	35	M	5082.99	77	1.76	24.858	LDH+L5 isthmic spondylolisthesis	UBE-PLIF+discectomy	1	L5/S1	283	3	2	200	100							56	41	22	13	25	12	8	4	6	4	2	1	5	2	1	1	120	226	93		1.44	29.3
44	0779981	20221216	20221222	6	15	4	44	M	4943.53	75	1.7377	24.8377	LDH	laminectomy+syndesmectomy	2	L4/5,L5/S1	118	2	2	20	20							52	39	20	9	32	15	8	4	6	3	1	1	5	2	1	1	106	212	98		3.67	1.26
48	0779421	20221114	20221119	5	13	10	41	M	4821.48	72	1.73	24.0569	LDH	percutaneous lumbar discectomy+laminectomy+syndesmectomy	1	L5/S1	108	1	1	20	10							52	38	22	10	27	18	9	6	6	4	2	1	5	3	1	1					8	2
53	0651946	20221024	20221106	12	13	0.5	36	M	4724.35	70	1.72	23.6614	LDH	percutaneous lumbar discectomy+laminectomy+syndesmectomy	1	L5/S1	109	1	1	50	20							59	38	21	10	47	31	16	7	7	4	2	1	6	4	1	1	431	876	233		3	17
57	2121907	20220927	20221009	10	13	10	51	M	4824.68	73	1.72115	24.6424	LDH	laminectomy+syndesmectomy	2	L4/5,L5/S1	153	3	2	20	40							60	45	21	10	46	37	19	6	6	4	2	1	6	2	1	1	231	345	123		1	20
59	1418631	20220929	20221024	16	13	6	28	M	5391.18	80	1.82	24.1517	LDH	percutaneous lumbar discectomy+laminectomy+syndesmectomy+Annulus fibrosus suture	1	L4/5	109	1	1	20	15							57	36	19	10	44	16	8	5	6	4	1	1	6	2	1	1	159	326	101		1	3
60	0639186	20221005	20221027	14	14	1.25	31	M	4991.01	72	1.78	22.7244	LDH	percutaneous lumbar discectomy+laminectomy+syndesmectomy+Annulus fibrosus suture	1	L4/5	115	2	2	20	20							38	20	10	3	42	17	9	2	6	5	1	1	6	3	1	1	112	278	97		1	3
61	0743496	20220923	20221019	10	14	2	25	M	4661.38	62	1.77778	19.6171	LDH	laminectomy+syndesmectomy	1	L2/3	115	2	2	10	20							57	39	14	6	54	24	8	2	8	5	2	1	6	3	2	1	95	231	76		1	4
62	0614249	20220907	20220928	20	14	0.03	37	M	4920.32	73	1.75	23.8367	LDH	percutaneous lumbar discectomy+laminectomy+syndesmectomy+Annulus fibrosus suture	1	L4/5	166	3	1	20	20							71	56	33	10	47	28	14	8	7	5	2	2	6	2	1	1	93	193	91		1	12
65	1414296	20220824	20220903	5	13	0.06	63	M	4476.75	61	1.73284	20.3149	LDH	percutaneous lumbar discectomy+laminectomy+syndesmectomy	1	L4/5	109	1	1	10	15							19	10	5	5	49	31	18	10	3	1	1	1	6	2	1	1	180	220	101		1	9
67	0658019	20220910	20220917	4	13	0.5	58	M	4114.25	55	1.68	19.487	spinal stenosis	laminectomy+syndesmectomy	1	L3/4	121	1	1	10	15							45	31	20	12	32	15	10	7	6	4	2	1	5	2	1	1	87	186	90		2	9
68	6905851	20220809	20220824	15	12	1	21	M	4789.29	71	1.73	23.7228	LDH+L5 isthmic spondylolisthesis	UBE-PLIF+discectomy	1	L5/S1	291/169	12	3/2	200	220							57	36	20	11	55	19	8	6	7	4	2	1	6	3	1	1	153	1322			4	7
72	2120859	20220626	20220706	6	12	0.08	58	M	4788.73	72	1.72	24.3375	LDH	percutaneous lumbar discectomy+laminectomy+syndesmectomy	1	L4/5	156	0.5	0.5	10	10							57	35	17	9	44	23	11	4	7	4	2	1	6	3	1	1	56	199			1	17
73	6913003	20220628	20220711	14	13	1.5	48	M	5519.94	84	1.82	25.3593	LDH	UBE-PLIF+discectomy	1	L4/5	343	11	3	400	50							55	36	15	7	43	27	15	7	6	3	2	1	5	2	1	1	109	1575	109		1	16
75	0400332	20220515	20220617	30	13	1	36	M	4820.92	73	1.72	24.6755	LDH	percutaneous lumbar discectomy+laminectomy+syndesmectomy	1	L4/5	143	1.5	1	10	10							53	32	16	7	42	26	14	6	6	3	2	1	5	3	1	1	73	166	57		2	3
76	0348664	20220526	20220607	12	12	3	75	M	5217.63	79	1.78037	24.9234	LDH	percutaneous lumbar discectomy+laminectomy+syndesmectomy	2	L3/4,L4/5	233	4	3	20	100							65	52	36	13	60	36	24	12	7	5	3	2	6	4	2	1	120	998	563		6	76
77	0766827	20220619	20220625	20	12	0.5	67	M	4788.74	74	1.7	25.6055	LDH+L4 isthmic spondylolisthesis	UBE-PLIF+discectomy	1	L4/5	305	1.5	1.5	100	50							25	21	15	11	44	29	15	9	4	2	1	1	4	2	1	1	122	378			5	14
79	2900218	20220509	20220527	10	13	0.02	47	M	3992.93	55	1.64	20.4491	LDH	percutaneous lumbar discectomy+laminectomy+syndesmectomy	1	L4/5	115	1.8	1.8	20	110							38	25	13	8	17	10	7	5	5	3	1	1	4	2	1	1	34	197	22		1	13
80	0378142	20220428	20220503	6	13	0.03	46	M	4344.61	65	1.65	23.8751	LDH	percutaneous lumbar discectomy+laminectomy+syndesmectomy	1	L4/5	90	0.8	0.8	50	20							19	10	7	4	32	27	16	8	4	2	1	1	5	2	1	1	165	276	165		2	18
81	0398622	20220506	20220518	12	13	3.5	30	M	5345.1	83	1.78	26.1962	LDH	percutaneous lumbar discectomy+laminectomy+syndesmectomy	1	L5/S1	167	1.8	1.8	30	20							43	22	13	10	42	37	9	6	7	5	3	1	6	5	2	1	134	231	52		3	17
82	1413877	20220509	20220524	15	13	0.08	26	M	5822.25	93	1.82345	27.9702	LDH	percutaneous lumbar discectomy+laminectomy+syndesmectomy+Annulus fibrosus suture	1	L5/S1	180	2.6	1.7	20	20							33	24	12	9	19	10	7	5	6	4	3	1	4	2	1	1	170	284	187		2	14
83	0634919	20220425	20220517	22	13	6.5	29	M	5216.34	79	1.78	24.9337	LDH	percutaneous lumbar discectomy+laminectomy+syndesmectomy	1	L5/S1	145	2.5	2.5	20	45							74	59	25	12	35	20	15	9	7	5	4	2	5	3	1	1	78	110	80		2	18
86	0001063	20220408	20220422	14	14	0.08	62	M	4756.36	72	1.71	24.623	LDH	percutaneous lumbar discectomy+laminectomy+syndesmectomy	1	L5/S1	115	1.8	1.8	20	75							55	45	35	15	38	29	18	8	6	4	3	1	6	3	2	1	49	354	214		5	93
87	0655173	20220414	20220420	16	14	4	33	M	5492.22	82	1.83	24.4857	LDH	percutaneous lumbar discectomy+laminectomy+syndesmectomy	2	L4/5,L5/S1	330	1.1	1.1	100	20							57	50	41	32	48	27	18	9	6	5	4	2	5	2	2	2	163	1027			2	106
88	6910237	20220111	20220117	6	17	0.55	34	M	4789.29	71	1.73	23.7228	cervical spondylotic radiculopathy	percutaneous cervical discectomy+laminectomy+syndesmectomy	1	C5/6	115	1.2	0.5	20	20				14	16																		58	233	124	39	2	18
90	0654093	20220214	20220225	11	14	0.17	30	M	5412.36	84	1.79	26.2164	LDH	percutaneous lumbar discectomy+laminectomy+syndesmectomy	1	L5/S1	120	2.1	1	50	10							18	15	10	7	36	26	16	8	3	2	2	1	4	2	1	1	110	278	123	98	1	12
91	6905139	20220216	20220304	16	15	3	58	M	4724.36	72	1.7	24.9135	LDH	percutaneous lumbar discectomy+laminectomy+syndesmectomy	1	L3/4	236	2.3	2.5	50	40							42	31	26	15	38	28	21	12	6	5	3	2	5	3	2	2	73	276.6	154		3	26
93	1447851	20211227	20220125	29	17	10	65	M	4950.24	76	1.73	25.3934	LDH	percutaneous lumbar discectomy+laminectomy+syndesmectomy	1	L4/5	270	13	13	50	120							62	47	31	21	34	21	14	6	6	5	4	3	4	2	2	1	320	266.4	212.8	52	5	33
94	0713652	20211225	20220104	10	17	0.02	59	M	4724.93	73	1.69	25.5593	cervical spondylotic radiculopathy	percutaneous cervical discectomy+laminectomy+syndesmectomy	1	C5/6	189	1	1.5	20	15				15	17																		94				6	30
95	0022235	20220106	20220125	19	16	6	50	M	4756.36	72	1.71	24.623	LDH	percutaneous lumbar discectomy+laminectomy+syndesmectomy	1	L4/5	176	6	3	30	20							59	48	39	10	38	24	18	10	8	5	3	3	5	3	1	1	66				3	16
96	1395503	20220105	20220120	15	17	0.5	23	M	4628.36	70	1.69	24.5089	L4 isthmic spondylolisthesis	UBE-PLIF+discectomy	1	L4/5	249	7	3.5	100	70							55	42	23	10	12	9	5	3	6	4	3	2	1	1	1	1	62				1
97	0131164	20211207	20211228	21	18	12	38	M	5085.09	76	1.77	24.2587	LDH	percutaneous lumbar discectomy+laminectomy+syndesmectomy+Annulus fibrosus suture	1	L5/S1	123	2	1	54	50							37	25	13	9	22	15	10	3	6	3	2	2	3	2	1	1	92				1
100	0632882	20211210	20211231	21	18	0.08	23	M	4566.22	70	1.67	25.0995	L5 isthmic spondylolisthesis	UBE-PLIF+discectomy	1	L5/S1	310	10	4	300	120							32	22	15	10	4	4	3	2	6	5	4	1	2	1	1	1	106				2	20
101	1447287	20211122	20211216	24	19	0.02	32	M	4885.3	75	1.72	25.3515	L5 isthmic spondylolisthesis	UBE-PLIF+discectomy	1	L5/S1	330	9	2.3	100	80							35	27	22	11	5	3	2	1	6	5	3	3	2	1	1	1	90				1	8
102	6909412	20211203	20211213	10	19	5.01	46	M	4534.03	69	1.67	24.7409	LDH	percutaneous lumbar discectomy+laminectomy+syndesmectomy	1	L4/5	180	8	1	20	10							78	65	47	25	56	48	39	18	7	5	5	2	6	5	3	1	138				1
103	0246151	20210317	20210513	57	27	1.25	21	M	5219.22	78	1.79	24.3438	LDH	percutaneous lumbar discectomy+laminectomy+syndesmectomy	1	L4/5	280	3	1.8	20	10							40	36	22	16	18	15	10	6	5	4	3	1	3	2	2	1	103			41	1	1
104	1423755	20210922	20211008	16	20	4.08	34	M	5280.72	81	1.78	25.565	LDH	percutaneous lumbar discectomy+laminectomy+syndesmectomy	1	L4/5	300	7	1.2	20	230			20				49	19	15	10	52	35	15	10	6	3	2	1	7	4	2	1	101				1	44
105	0728022	20211109	20211130	21	19	0.5	27	M	5213.85	80	1.77	25.5354	L5 isthmic spondylolisthesis	UBE-PLIF+discectomy	1	L5/S1	420	6	3.4	200	100							55	50	38	20	11	10	13	8	6	5	6	3	2	2	2	1	141				1
106	0758971	20211115	20211213	28	19	0.08	20	M	4950.24	76	1.73	25.3934	L5 isthmic spondylolisthesis	UBE-PLIF+discectomy	1	L5/S1	300	8	3	200	70							70	38	48	18	10	9	8	9	7	5	5	4	2	2	2	1	212			74	1
												23.9355
						4.03062						2.23054
						5.65762			4430.45					10	79	28
									685.556					10	22
														14	2
																	330	210
																	283	115	0.69059	1.84211	1.82714
																	291	189		1.97971	1.55442
																	305	171.333
																	249	49.9032
																	310
																	330
																	420
																	300
																	313.111
																	47.1021
[truncated: 19 more columns]

## Sheet: Sheet5
Surgical method	Surgical method	Surgical segments	Surgical time(min)	Hospital stay(D)	Pos-immoblization time(d)	Duration of drainage(d)	intra-BL(ml)	Pos-BL(ml)	Pre-Hct	Pos-Hct1	Ave-Hct	ΔHct	PBV	TBL	HBL	Pre-Hb	Pos-Hb1	ΔHb	Pre-CK	Pos-CK1	ΔCK	Pre-CRP	Pos-CRP1	ΔCRP	Pre-ODI-Back(%)	Pos-ODI-Back-1m	Pos-ODI-Back-3m	Pos-ODI-Back-1y	Pre-ODI-Leg	Pos-ODI-leg-1m	Pos-ODI-leg-3m	Pos-ODI-leg-1y	Pre-VAS-Back	Pos-VAS-Back-1m	Pos-VAS-Back-3m	Pos-VAS-Back-1y	Pre-VAS-Leg	Pos-VAS-Leg-1m	Pos-VAS-Leg-3m	Pos-VAS-Leg-1y	Follow-up(m)
percutaneous lumbar discectomy+laminectomy+syndesmectomy	1	1	80	4	1	0.5	50	60	30.84	29.8	30.32	1.04	3295.69	113.045	3.04484	105	99	6	11	89	78	0.26	11.21	10.95	45	12	8	5	42	35	22	15	6	5	2	1	7	4	0	0	14
percutaneous lumbar discectomy+laminectomy+syndesmectomy	1	1	93	5	2	1	50	15	42.2	40.3	41.25	1.9	3864.15	177.985	112.985	134	127	7	33	98	65	0.2	11.25	11.05	57	20	9	4	35	21	12	5	7	1	1	1	5	2	0	0	14
percutaneous lumbar discectomy+laminectomy+syndesmectomy	1	1	95	4	1	1	15	50	46	44	45	2	3904.24	173.522	108.522	149	143	6	113	218	105	3.17	14.89	11.72	48	24	7	3	22	16	9	6	7	2	1	1	6	2	0	0	12
percutaneous lumbar discectomy+laminectomy+syndesmectomy	1	1	100	3	1	0.5	15	60	38.2	36.2	37.2	2	4557.85	245.046	170.046	127	124	3	76	167	91	0.77	11.78	11.01	41	31	10	5	21	14	6	3	8	1	1	1	7	2	1	1	16
percutaneous lumbar discectomy+laminectomy+syndesmectomy	1	1	100	2	1	0.5	100	20	39.5	36.8	38.15	2.7	3692.65	261.341	141.341	131	123	8	123	225	102	0.2	12.67	12.47	54	25	22	9	39	21	14	10	6	3	1	1	6	3	2	0	12
percutaneous lumbar discectomy+laminectomy+syndesmectomy	1	1	122	3	2	1	20	30	40.4	38.8	39.6	1.6	3720.37	150.318	100.318	133	109	24	90	208	118	1	15.67	14.67	46	24	19	15	30	22	19	15	7	1	1	1	7	3	1	0	13
percutaneous lumbar discectomy+laminectomy+syndesmectomy	1	1	102	5	2	1	10	30	38.7	36.8	37.75	1.9	3930.31	197.817	157.817	125	109	16	45	109	64	3.65	7.94	4.29	53	19	22	14	32	21	16	7	9	2	1	1	7	2	2	1	15
percutaneous lumbar discectomy+laminectomy+syndesmectomy	1	1	107	5	2	1	20	40	44.6	42.8	43.7	1.8	4018.09	165.505	105.505	148	142	6	100	234	134	1.57	9.48	7.91	55	20	10	8	35	18	16	10	8	2	2	1	7	2	1	0	13
percutaneous lumbar discectomy+laminectomy+syndesmectomy	1	1	100	4	2	1	20	30	42.4	40.9	41.65	1.5	3908.76	140.772	90.7716	139	133	6	74	197	123	0.33	10.23	9.9	43	31	17	10	31	23	16	10	7	2	1	1	6	3	0	0	17
percutaneous lumbar discectomy+laminectomy+syndesmectomy	1	1	108	4	3	1	50	30	39	36.6	37.8	2.4	3455.73	219.411	139.411	134	119	15	45	270	225	7.35	18.09	10.74	53	34	22	14	32	21	16	7	6	3	1	1	7	2	1	1	14
percutaneous lumbar discectomy+laminectomy+syndesmectomy	1	1	105	3	3	1	50	30	38.2	36.4	37.3	1.8	3847.47	185.669	105.669	131	126	5	37	198	161	4.02	10.87	6.85	45	36	20	15	36	23	10	10	7	1	1	1	6	3	0	0	14
percutaneous lumbar discectomy+laminectomy+syndesmectomy	1	1	101	2	1	0.5	20	20	37.1	35.2	36.15	1.9	3308.03	173.866	133.866	127	132	-5	99	213	114	0.4	13.8	13.4	42	33	12	6	35	15	8	5	6	3	1	1	7	2	1	1	14
percutaneous lumbar discectomy+laminectomy+syndesmectomy	1	1	112	3	1	0.5	20	25	39.3	37.1	38.2	2.2	3772.95	217.29	172.29	131	119	12	163	317	154	4	18	14	59	24	17	6	37	26	14	10	5	1	1	1	6	2	1	1	13
percutaneous lumbar discectomy+laminectomy+syndesmectomy	1	1	113	5	0.5	0.5	30	25	36.8	34.2	35.5	2.6	3500.61	256.383	201.383	131	118	13	50	167	117	2	11	9	58	22	15	7	31	25	13	5	6	4	1	1	6	1	1	1	13
percutaneous lumbar discectomy+laminectomy+syndesmectomy	1	1	114	6	2	1	30	25	38.8	36	37.4	2.8	3738.84	279.913	224.913	130	120	10	84	189	105	1	17	16	57	26	17	9	28	15	10	6	8	3	1	1	4	1	1	1	13
percutaneous lumbar discectomy+laminectomy+syndesmectomy	1	1	110	2	0.5	0.5	20	10	38	36.5	37.25	1.5	3682.07	148.271	118.271	128	124	4	36	247	211	1	9	8	62	51	28	15	39	26	17	11	9	2	2	1	6	1	1	1	13
percutaneous lumbar discectomy+laminectomy+syndesmectomy	1	1	122	6	1.5	1	50	15	39.5	36.3	37.9	3.2	3539.59	298.857	233.857	135	109	26	71	198	127	1	10	9	67	28	19	8	32	13	8	3	6	2	1	1	7	3	1	1	13
percutaneous lumbar discectomy+laminectomy+syndesmectomy	1	1	113	5	1.5	1	10	20	34.6	32.7	33.65	1.9	4458.61	251.749	221.749	116	111	5	85	256	171	4	17	13	44	33	22	11	32	21	14	9	8	3	1	1	7	4	1	0	12
percutaneous lumbar discectomy+laminectomy+syndesmectomy	1	1	114	4	1	1	20	30	41.5	38.6	40.05	2.9	3900.07	282.402	232.402	138	109	29	79	216	137	1	19	18	67	39	18	10	43	31	17	15	7	2	1	1	6	5	1	0	12
percutaneous lumbar discectomy+laminectomy+syndesmectomy	1	1	90	4	0.5	0.5	50	20	37.1	34.9	36	2.2	3738.84	228.484	158.484	129	106	23	90	213	123	12	26	14	48	33	18	6	41	29	17	8	6	1	0	0	5	2	1	1	12
percutaneous lumbar discectomy+laminectomy+syndesmectomy	1	1	110	3	1.4	1	30	10	38	36.3	37.15	1.7	3929.33	179.808	139.808	127	126	1	40	168	128	2	23	21	40	31	17	8	20	10	8	5	7	1	0	0	6	2	1	1	14
percutaneous lumbar discectomy+laminectomy+syndesmectomy	1	1	124	3	1.5	1	20	50	36.2	33	34.6	3.2	3904.24	361.086	291.086	123	115	8	88	225	137	4	21	17	37	24	12	4	26	14	9	6	8	2	1	1	6	3	1	1	14
percutaneous lumbar discectomy+laminectomy+syndesmectomy	1	1	122	5	3.5	2	20	40	39.5	37.2	38.35	2.3	4250.81	254.938	194.938	131	116	15	81	212	131	7	42	35	51	42	28	12	28	15	10	6	6	1	1	1	4	2	0	0	15
percutaneous lumbar discectomy+laminectomy+syndesmectomy	1	1	120	2	0.5	0.5	50	20	42.3	39.9	41.1	2.4	3819.61	223.043	153.043	145	140	5	84	221	137	2	25	23	43	37	29	16	37	24	16	5	7	1	1	1	7	3	1	1	17
percutaneous lumbar discectomy+laminectomy+syndesmectomy	1	1	115	3	3	1	20	30	39.3	36.5	37.9	2.8	3453.84	255.165	205.165	135	106	29	45	185	140	5	23	18	73	49	36	17	43	27	18	12	8	1	1	1	6	4	1	1	18
percutaneous lumbar discectomy+laminectomy+syndesmectomy	1	1	85	4	1	0.5	50	50	46	43.2	44.6	2.8	4531.22	284.471	184.471	149	133	16	100	178	78	3.38	15.02	11.64	50	26	24	17	43	31	23	18	7	4	2	1	6	4	2	1	14
percutaneous lumbar discectomy+laminectomy+syndesmectomy	1	1	96	3	1	0.5	65	50	47	43.9	45.45	3.1	4984.7	339.991	224.991	157	132	25	72	298	226	4.88	15.39	10.51	55	40	25	18	44	30	28	22	8	3	2	1	5	4	1	0	13
percutaneous lumbar discectomy+laminectomy+syndesmectomy	1	1	92	6	2	1	30	25	47.3	45.2	46.25	2.1	5145.65	233.641	178.641	158	148	10	46	301	255	4.75	16.49	11.74	48	33	24	12	33	21	10	9	8	1	1	1	7	2	1	1	15
percutaneous lumbar discectomy+laminectomy+syndesmectomy	1	1	89	5	2	1	30	25	41.1	38.8	39.95	2.3	4306.46	247.931	192.931	137	135	2	78	190	112	1.89	12.24	10.35	59	45	21	12	38	26	12	10	7	1	1	1	5	4	1	1	13
percutaneous lumbar discectomy+laminectomy+syndesmectomy	1	1	101	4	1	0.5	100	20	46.5	43.2	44.85	3.3	5275.03	388.129	268.129	152	145	7	85	285	200	2.81	14.28	11.47	47	32	16	8	13	10	6	5	6	4	2	2	7	2	1	1	14
percutaneous lumbar discectomy+laminectomy+syndesmectomy	1	1	110	4	2	1	20	50	38.1	35.4	36.75	2.7	4025.12	295.723	225.723	130	121	9	254	654	400	2.02	13.05	11.03	74	55	35	19	53	40	21	18	7	3	1	1	6	3	1	2	16
percutaneous lumbar discectomy+laminectomy+syndesmectomy	1	1	120	3	1	0.5	50	70	37.4	35.3	36.35	2.1	4308.7	248.921	128.921	129	128	1	93	208	115	3.23	15.42	12.19	58	26	18	8	32	21	15	9	6	1	1	1	7	3	2	1	15
percutaneous lumbar discectomy+laminectomy+syndesmectomy	1	1	121	3	1	1	50	20	45.1	43.5	44.3	1.6	5147.37	185.909	115.909	153	146	7	108	388	280	1.35	12.45	11.1	47	25	13	9	35	14	6	5	6	3	1	1	6	1	1	1	15
percutaneous lumbar discectomy+laminectomy+syndesmectomy	1	1	128	2	0.5	0.5	30	30	45.2	42.5	43.85	2.7	4338.08	267.111	207.111	148	141	7	51	178	127	2.29	14.39	12.1	47	32	19	4	32	20	14	6	7	3	1	1	5	2	1	1	15
percutaneous lumbar discectomy+laminectomy+syndesmectomy	1	1	108	2	0.5	0.5	20	10	41.2	40.1	40.65	1.1	4821.48	130.471	100.471	146	152	-6	89	308	219	8	18	10	52	28	18	10	27	18	9	6	8	4	2	2	5	3	1	1	13
percutaneous lumbar discectomy+laminectomy+syndesmectomy	1	1	109	2	0.5	0.5	50	20	40.5	38.3	39.4	2.2	4724.35	263.796	193.796	140	103	37	431	876	445	3	17	14	59	27	16	10	47	31	16	7	7	1	1	1	7	4	1	1	13
percutaneous lumbar discectomy+laminectomy+syndesmectomy	1	1	109	5	2	1	10	15	34.9	31.8	33.35	3.1	4476.75	416.13	391.13	118	108	10	86	220	134	1	9	8	19	10	5	2	49	31	18	10	8	1	1	1	6	2	1	1	13
percutaneous lumbar discectomy+laminectomy+syndesmectomy	1	1	117	4	2	1	10	10	41.4	38.9	40.15	2.5	4788.73	298.178	278.178	140	129	11	56	199	143	1	17	16	57	23	17	9	44	23	11	4	7	2	2	1	7	3	1	1	12
percutaneous lumbar discectomy+laminectomy+syndesmectomy	1	1	103	2	0.5	0.5	10	10	42.7	41.6	42.15	1.1	4820.92	125.813	105.813	138	134	4	73	166	93	2	13	11	53	24	16	7	42	26	14	6	6	1	1	1	5	3	1	1	13
percutaneous lumbar discectomy+laminectomy+syndesmectomy	1	1	115	2	0.5	0.5	20	110	39.8	35.8	37.8	4	3992.93	422.532	292.532	136	122	14	34	197	163	1	13	12	38	25	13	8	17	10	7	5	7	1	1	1	4	2	1	1	13
percutaneous lumbar discectomy+laminectomy+syndesmectomy	1	1	90	3	1.5	1	50	20	44.7	43	43.85	1.7	4344.61	168.434	98.4342	154	147	7	165	276	111	2	18	16	19	10	6	2	32	27	16	8	8	2	1	1	5	2	1	1	13
percutaneous lumbar discectomy+laminectomy+syndesmectomy	1	1	125	3	1.5	1	30	20	41	39.1	40.05	1.9	5345.1	253.575	203.575	141	129	12	54	231	177	3	17	14	43	22	13	10	42	37	9	6	7	1	0	0	6	5	0	0	13
percutaneous lumbar discectomy+laminectomy+syndesmectomy	1	1	133	3	1	0.5	20	45	45.8	43.1	44.45	2.7	5216.34	316.853	251.853	160	149	11	78	310	232	2	18	16	74	42	25	12	35	20	15	9	7	2	1	1	7	3	1	1	13
percutaneous lumbar discectomy+laminectomy+syndesmectomy	1	1	115	3	2	1	20	75	42.1	39.5	40.8	2.6	4756.36	303.101	208.101	143	135	8	49	354	305	5	23	18	55	32	9	4	38	29	18	8	6	1	0	0	6	3	0	0	14
percutaneous lumbar discectomy+laminectomy+syndesmectomy	1	1	120	2	0.5	0.5	50	10	45	42.6	43.8	2.4	5412.36	296.567	236.567	156	137	19	110	278	168	1	12	11	18	15	10	7	36	26	16	8	8	2	1	1	4	2	1	1	14
percutaneous lumbar discectomy+laminectomy+syndesmectomy	1	1	112	3	2	1	50	40	42.5	39	40.75	3.5	4724.36	405.773	315.773	144	137	7	73	276.6	203.6	3	18	15	42	21	8	3	38	28	21	12	8	1	0	0	5	3	0	0	15
percutaneous lumbar discectomy+laminectomy+syndesmectomy	1	1	126	4	1	0.5	50	120	42.4	39.8	41.1	2.6	4950.24	313.154	143.154	148	142	6	110	266.4	156.4	5	16	11	62	34	21	17	34	21	14	6	8	2	0	0	6	2	1	1	17
percutaneous lumbar discectomy+laminectomy+syndesmectomy	1	1	136	3	1	1	30	20	45.5	43.2	44.35	2.3	4756.36	246.666	196.666	157	130	27	66	300	234	3	16	13	59	32	18	7	38	24	18	10	8	1	1	1	7	3	1	1	16
percutaneous lumbar discectomy+laminectomy+syndesmectomy	1	1	133	2	0.5	0.5	20	10	36.4	34.6	35.5	1.8	4534.03	229.895	199.895	130	116	14	138	290	152	1	18	17	78	45	20	14	56	48	39	18	7	2	0	0	7	5	1	0	19
percutaneous lumbar discectomy+laminectomy+syndesmectomy	1	1	130	2	0.5	0.5	20	10	46.9	45.1	46	1.8	5219.22	204.23	174.23	151	134	17	103	240	137	1	16	15	40	26	19	9	18	15	10	6	7	2	0	0	6	2	1	1	27
percutaneous lumbar discectomy+laminectomy+syndesmectomy	1	1	140	4	1	0.5	20	230	42.1	38.5	40.3	3.6	5280.72	471.726	221.726	139	133	6	101	252	151	1	15	14	49	19	10	6	52	35	15	10	7	1	0	0	7	4	2	1	20
percutaneous lumbar discectomy+laminectomy+syndesmectomy	1	2	165	3	2	1.5	70	30	43.2	39.4	41.3	3.8	3572.67	328.72	228.72	141	109	32	110	319	209	9.69	28.11	18.42	63	31	29	23	47	29	16	16	7	3	1	0	7	3	1	1	15
percutaneous lumbar discectomy+laminectomy+syndesmectomy	1	2	155	5	1.5	1	80	50	34.2	32.1	33.15	2.1	3553.08	225.082	95.0822	113	101	12	80	303	223	0.52	23.82	23.3	57	30	29	17	40	30	18	16	9	2	1	0	8	1	0	0	13
percutaneous lumbar discectomy+laminectomy+syndesmectomy	1	2	112	4	1.5	1	100	30	38.6	33.6	36.1	5	3354.6	464.627	334.627	130	111	19	67	189	122	0.3	21.42	21.12	58	24	16	4	22	13	6	4	8	2	1	1	7	1	1	1	13
percutaneous lumbar discectomy+laminectomy+syndesmectomy	1	2	156	3	1.5	1	100	50	34.1	29.2	31.65	4.9	4098.55	634.53	484.53	114	100	14	189	390	201	2	25	23	61	29	20	16	32	19	9	6	7	1	1	1	5	2	1	1	13
percutaneous lumbar discectomy+laminectomy+syndesmectomy	1	2	152	3	1.5	1	60	30	36	29.5	32.75	6.5	3677.2	729.826	639.826	121	94	27	30	287	257	1	20	19	55	28	28	15	37	19	10	7	8	3	1	0	7	2	1	1	13
percutaneous lumbar discectomy+laminectomy+syndesmectomy	1	2	136	3	1	0.5	90	15	35.1	28.7	31.9	6.4	3308.03	663.68	558.68	119	97	22	270	478	208	1	22	21	58	27	26	15	45	34	22	14	7	2	1	1	8	3	2	1	12
percutaneous lumbar discectomy+laminectomy+syndesmectomy	1	2	189	4.5	1.5	1	60	50	34.2	29.5	31.85	4.7	3715.15	548.232	438.232	117	104	13	61	329	268	4	28	24	61	28	20	16	43	34	26	14	8	3	2	0	7	3	2	0	16
percutaneous lumbar discectomy+laminectomy+syndesmectomy	1	2	160	3.5	1.5	0.5	90	40	42.8	36.5	39.65	6.3	5251.41	834.397	704.397	146	123	23	47	309	262	3.61	10.23	6.62	64	33	31	22	49	28	18	16	7	2	1	1	7	3	1	0	13
percutaneous lumbar discectomy+laminectomy+syndesmectomy	1	2	156	3.5	2	1	70	40	45.9	38.9	42.4	7	4402.46	726.821	616.821	151	128	23	62	319	257	0.45	22.1	21.65	46	32	16	10	42	22	13	7	8	2	1	1	8	2	1	1	14
percutaneous lumbar discectomy+laminectomy+syndesmectomy	1	2	125	4	1.5	1	80	70	45.7	40.5	43.1	5.2	4578.14	552.351	402.351	152	139	13	36	267	231	2.38	16.67	14.29	59	31	21	15	35	27	14	8	8	3	2	1	7	4	2	1	14
percutaneous lumbar discectomy+laminectomy+syndesmectomy	1	2	167	3	1	0.5	50	20	40.1	36.1	38.1	4	4081.13	428.465	358.465	132	118	14	70	299	229	0.09	20.35	20.26	55	30	17	10	38	19	15	8	8	4	1	0	7	3	1	1	13
percutaneous lumbar discectomy+laminectomy+syndesmectomy	1	2	149	4	1	1	90	50	35.2	31.2	33.2	4	4820.74	580.812	440.812	111	107	4	67	299	232	0.34	21.22	20.88	52	38	26	18	38	21	14	11	7	3	2	1	7	3	2	2	16
percutaneous lumbar discectomy+laminectomy+syndesmectomy	1	2	135	5	1.5	1	70	50	45.6	40.6	43.1	5	4724.35	548.069	428.069	152	132	20	203	433	230	0.55	23.36	22.81	91	21	10	6	87	16	6	5	9	3	1	1	6	1	1	1	13
percutaneous lumbar discectomy+laminectomy+syndesmectomy	1	2	156	3.5	1.5	0.5	90	80	52.1	45.8	48.95	6.3	5435.36	699.545	529.545	170	165	5	55	319	264	0.38	22.23	21.85	62	39	22	12	26	13	9	6	8	2	1	1	7	1	1	1	15
percutaneous lumbar discectomy+laminectomy+syndesmectomy	1	2	133	5	1	0.5	100	100	38	32.5	35.25	5.5	5217.63	814.098	614.098	130	106	24	120	433	313	6	28	22	65	27	22	13	60	36	24	12	9	3	2	1	6	3	2	1	12
percutaneous lumbar discectomy+laminectomy+syndesmectomy	1	2	159	4.5	1.5	0.5	100	30	42.3	39.1	40.7	3.2	5492.22	431.821	301.821	145	134	11	163	487	324	2	26	24	57	28	21	12	48	27	18	9	8	3	1	0	7	2	2	2	14
percutaneous lumbar discectomy+laminectomy+syndesmectomy	1	3	254	5	2	1	50	90	38	31	34.5	7	2972.47	603.11	463.11	123	102	21	63	167		1	25		63	47	28	12	33	21	14	8	7	5	3	1	4	2	1	1	13
laminectomy+syndesmectomy	2	1	104	3	2	0.5	50	30	41.6	38.8	40.2	2.8	3229.53	224.943	144.943	139	126	13	58	175	117	2.27	13.29	11.02	49	27	14	6	19	10	8	5	7	1	1	1	7	3	1	1	14
laminectomy+syndesmectomy	2	1	108	4	1	0.5	20	20	41.2	38.2	39.7	3	4271.34	322.771	282.771	136	127	9	55	176	121	4	15	11	55	28	19	9	31	20	12	6	7	2	1	1	7	3	1	1	13
laminectomy+syndesmectomy	2	1	95	3	1.5	1	10	20	36.2	33.7	34.95	2.5	3473.43	248.457	218.457	123	120	3	104	232	128	1	16	15	51	32	18	10	39	21	11	8	6	1	1	1	6	2	0	0	12
laminectomy+syndesmectomy	2	1	96	3	2	1	50	20	41.8	39.7	40.75	2.1	5184.15	267.158	197.158	141	126	15	67	199	132	9.92	21.56	11.64	60	31	20	14	54	22	10	6	9	3	2	1	6	2	1	1	12
laminectomy+syndesmectomy	2	1	102	4	1	0.5	50	40	49.9	46.8	48.35	3.1	4436.15	284.428	194.428	164	142	22	89	218	129	1.04	16.06	15.02	43	32	21	11	34	18	15	10	6	3	1	1	5	1	1	0	14
laminectomy+syndesmectomy	2	1	98	4	1	1	10	20	40.7	38.7	39.7	2	4661.38	234.83	204.83	142	132	10	74	231	157	1	9	8	57	29	14	6	54	24	8	2	7	1	2	0	6	1	0	0	14
laminectomy+syndesmectomy	2	1	102	3	1	1	10	15	44.7	41.2	42.95	3.5	4114.25	335.271	310.271	141	130	11	75	186	111	2	12	10	45	28	19	12	32	15	10	7	8	2	0	0	7	2	1	1	13
laminectomy+syndesmectomy	2	2	125	4	1	0.5	80	50	42.4	38.7	40.55	3.7	4617.44	421.32	291.32	139	133	6	51	241	190	2.04	22.5	20.46	67	29	19	10	53	31	16	7	9	3	2	1	6	4	2	1	12
laminectomy+syndesmectomy	2	2	126	4	1.5	1	60	30	36.5	31.6	34.05	4.9	3463.05	498.353	408.353	125	117	8	80	286	206	3.25	25.68	22.43	58	30	18	11	39	25	14	6	7	2	1	1	5	3	1	1	16
laminectomy+syndesmectomy	2	2	122	5	2	1	70	20	40	36.2	38.1	3.8	4293.21	428.194	338.194	138	126	12	123	326	203	2	15	13	59	28	21	12	38	30	19	10	8	2	2	1	6	3	1	1	14
laminectomy+syndesmectomy	2	2	133	3	1.5	1.5	60	30	45.7	41.9	43.8	3.8	4693.67	407.213	317.213	155	134	21	53	289	236	1	20	19	57	27	20	13	31	17	10	7	7	1	1	0	5	2	1	1	16
laminectomy+syndesmectomy	2	2	145	4	1	0.5	60	50	42.6	39.2	40.9	3.4	4943.53	410.954	300.954	154	135	19	106	299	193	3.67	24	20.33	58	39	19	9	32	15	8	4	8	3	1	0	5	2	1	1	15
laminectomy+syndesmectomy	2	2	134	3	1.5	0.5	80	40	43.6	39.8	41.7	3.8	4824.68	439.659	319.659	150	129	21	231	435	204	1	19	18	60	28	18	10	46	37	19	6	7	2	1	1	6	2	1	1	13
laminectomy+syndesmectomy	2	3	205	5	1.5	1	70	40	37.2	34	35.6	3.2	4757.1	427.605	317.605	127	110	17	58	124		3.86	14.28		77	57	38	20	23	16	9	6	8	5	3	2	5	3	1	1	15.60
percutaneous lumbar discectomy+laminectomy+syndesmectomy+Annulus fibrosus suture	3	1	130	3	1	0.5	20	50	39.8	36.4	38.1	3.4	3376.85	301.347	231.347	134	115	19	74	178	104	2	16	14	44	24	12	4	17	8	6	3	5	4	3	1	4	2	2	1	14
percutaneous lumbar discectomy+laminectomy+syndesmectomy+Annulus fibrosus suture	3	1	129	3	1.5	1	35	20	48.8	45.2	47	3.6	5572.44	426.825	371.825	155	141	14	212	497	285	0.24	12.89	12.65	40	30	12	7	18	16	8	3	6	3	1	1	5	2	1	1	12
percutaneous lumbar discectomy+laminectomy+syndesmectomy+Annulus fibrosus suture	3	1	143	3.5	1.5	1	30	30	49.7	46.7	48.2	3	4469.66	278.195	218.195	163	154	9	95	235	140	0.1	12.23	12.13	42	29	10	7	21	10	6	5	6	2	1	1	4	2	1	1	13
percutaneous lumbar discectomy+laminectomy+syndesmectomy+Annulus fibrosus suture	3	1	122	3.5	1.5	1	40	35	49.1	46.2	47.65	2.9	4854.62	295.454	220.454	157	145	12	107	172	65	0.91	19.32	18.41	52	31	17	8	28	18	9	6	6	4	1	1	4	1	1	1	13
percutaneous lumbar discectomy+laminectomy+syndesmectomy+Annulus fibrosus suture	3	1	133	5	1	0.5	30	35	44.1	40.2	42.15	3.9	5151.96	476.693	411.693	150	138	12	149	277	128	0.6	14.97	14.37	70	42	25	16	28	19	10	6	8	5	2	1	4	2	1	1	13
percutaneous lumbar discectomy+laminectomy+syndesmectomy+Annulus fibrosus suture	3	1	119	3	1	0.5	35	45	42.4	39.5	40.95	2.9	5391.18	381.793	301.793	141	128	13	85	326	241	1	15	14	57	36	19	10	44	16	8	5	6	4	1	1	6	2	1	1	13
percutaneous lumbar discectomy+laminectomy+syndesmectomy+Annulus fibrosus suture	3	1	125	3	2	1	30	35	41.5	38.2	39.85	3.3	4991.01	413.308	348.308	144.6	134	10.6	85	278	193	1	19	18	38	20	10	3	42	17	9	2	6	5	1	1	6	3	1	1	14
percutaneous lumbar discectomy+laminectomy+syndesmectomy+Annulus fibrosus suture	3	1	136	5	1	0.5	45	40	41.9	38.8	40.35	3.1	4920.32	378.018	293.018	148	134	14	93	203	110	1	12	11	71	56	33	10	47	28	14	8	7	5	2	2	6	2	1	1	14
percutaneous lumbar discectomy+laminectomy+syndesmectomy+Annulus fibrosus suture	3	1	134	3.5	1.5	1	55	55	49	46.7	47.85	2.3	5822.25	279.857	169.857	165	152	13	70	284	214	2	14	12	33	24	12	9	19	10	7	5	6	4	3	1	4	2	1	1	13
percutaneous lumbar discectomy+laminectomy+syndesmectomy+Annulus fibrosus suture	3	1	123	2	1.5	1	55	50	41	38.2	39.6	2.8	5085.09	359.552	254.552	137	125	12	92	220	128	1	15	14	37	25	13	9	22	15	10	3	6	3	2	2	3	2	1	1	18
percutaneous cervical discectomy+laminectomy+syndesmectomy	4	1	134	3	1.5	1	40	25	47.3	45.6	46.45	1.7	5842.56	213.829	148.829	159	150	9	128	268	140	3	13	10																	16
percutaneous cervical discectomy+laminectomy+syndesmectomy	4	1	121	3.75	1	1	20	35	41.2	38.9	40.05	2.3	4789.29	275.041	220.041	146	135	11	58	223	165	2	19	17																	17
percutaneous cervical discectomy+laminectomy+syndesmectomy	4	1	154	3.5	1.5	0.5	20	35	40.1	37.8	38.95	2.3	4724.93	279.007	224.007	141	133	8	94	289	195	6	23	17																	17
UBE-PLIF+discectomy	5	1	192	9	2	1.5	100	70	37.4	31.4	34.4	6	3142.63	548.133	378.133	125	108	17	55	449	394	1	47	46	53	39	26	12	38	29	18	8	7	4	1	0	7	4	2	1	12
UBE-PLIF+discectomy	5	1	183	14	3	0.75	100	100	44.9	39.7	42.3	5.2	5082.99	624.859	424.859	157	144	13	120	390	270	1.44	59.34	57.9	56	41	22	13	25	12	8	4	6	2	2	1	7	2	1	0	13
UBE-PLIF+discectomy	5	1	191/169	15	2	0.75	150	150	40.1	33.1	36.6	7	4789.29	915.985	615.985	140	117	23	153	543	390	4	56.2	52.2	57	36	20	11	55	19	8	6	7	3	2	1	8	2	1	0	12
UBE-PLIF+discectomy	5	1	167	14	1	1.5	130	50	38.5	35.3	36.9	3.2	5519.94	478.694	298.694	136	117	19	109	519	410	1	16	15	55	36	15	7	43	27	15	7	6	2	2	1	7	2	1	1	13
UBE-PLIF+discectomy	5	1	194	20	1	1	100	50	44	39.2	41.6	4.8	4788.74	552.547	402.547	145	122	23	122	448	326	5	54.2	49.2	25	21	15	11	44	29	15	9	4	1	1	0	6	2	1	1	12
UBE-PLIF+discectomy	5	1	182	15	2	0.75	160	70	43.1	36.8	39.95	6.3	4628.36	729.878	499.878	143	123	20	62	509	447	1	41.7	40.7	55	42	23	10	12	9	5	3	6	2	1	1	2	1	1	0	17
UBE-PLIF+discectomy	5	1	208	21	1	1.5	100	120	46.9	39.2	43.05	7.7	4566.22	816.723	596.723	153	121	32	106	515	409	2	55.4	53.4	32	22	15	10	4	4	3	2	6	3	2	1	6	2	1	1	18
UBE-PLIF+discectomy	5	1	201	24	2	0.75	100	80	51.1	45.2	48.15	5.9	4885.3	598.614	418.614	179	159	20	90	517	427	1	54.5	53.5	35	27	22	11	5	3	2	1	6	2	2	1	5	1	1	0	19
UBE-PLIF+discectomy	5	1	206	21	1	1	100	100	42	36.8	39.4	5.2	5213.85	688.122	488.122	143	126	17	141	578	437	1	50.2	49.2	55	50	38	20	11	10	13	8	6	5	6	3	8	2	2	1	19
UBE-PLIF+discectomy	5	1	214	28	3	1	90	70	47	40.2	43.6	6.8	4950.24	772.056	612.056	156	131	25	212	627	415	1	45.8	44.8	70	38	48	18	10	9	8	9	7	5	2	1	7	1	1	0	19
												5.81		273.98	221.837			12.86			166.667			18.87
												1.28361		42.5865	56.4318			2.63658			27.5379			3.24234
																													#DIV/0!	#DIV/0!	#DIV/0!	#DIV/0!
																													#DIV/0!	#DIV/0!	#DIV/0!	#DIV/0!
														191.853	184.352
														136.936
														136.98
														202.308
														246.707
														175.02
														130.908
														200.274
														225.318
														152.939
														210.008
														225.515
														203.382
														142.778

## Sheet: Sheet4
6	5	2	1			45	12	8	5		63	31	21	12	7	3	1	0	7	3	1	1	49	27	14	6					5	1.5	1	192	80	165		104	155	Hospital stay(D)	Pos-immoblization time(d)	Duration of drainage(d)
7	1	1	1			57	20	9	4		57	30	20	11	9	2	1	0	8	1	0	0	55	28	19	9					6	2	1	183	93	155		108	164	3	2	0.5	4	1	0.5
7	2	1	1			48	22	7	3		58	24	16	4	8	2	1	1	7	1	1	1	51	32	18	10					7	3	1	191	95	112		95	172	4	1	0.5	4	1.5	1
8	1	1	1			41	24	10	5		61	29	20	9	7	1	1	1	5	2	1	1	60	31	20	14					5	1.5	0.5	167	100	156	136	96	163	3	1	1	5	1.5	1
6	3	1	1			54	31	22	9		55	28	18	8	8	3	1	0	7	2	1	1	43	32	21	11					4	1	0.5	194	100	152	129	102	168	2	2	1	3	2	1.5
7	1	1	1			46	25	19	15		58	27	17	7	7	2	1	1	8	3	2	1	57	29	14	6					5	2	0.5	182	122	136	143	98	166	4	1	0.5	3	1.5	0.5
9	2	1	1			53	24	22	14		61	28	20	9	8	3	2	0	7	3	2	0	45	28	19	12					5	1.5	1	208	102	189	122	102	164.667	3	1	1	3	1	0.5
8	2	2	1			55	19	10	8		64	33	19	22	7	2	1	1	7	3	1	0	51.4286	29.5714	17.8571	9.71429					7	2	1	201	107	160	133	100.714	5.71548	3	1	1	3.66667	1.41667	0.833333
7	2	1	1			43	20	17	10		46	32	16	10	8	2	1	1	8	2	1	1	6.26783	2.0702	2.79455	2.98408					4	1.5	1	206	100	156	119	4.64451		3.14286	1.28571	0.785714	0.816497	0.376386	0.408248
6	3	1	1			53	34	22	14		59	32	21	9	8	3	2	1	7	4	2	1									5	2	1	214	108	125	125			0.690066	0.48795	0.267261
7	1	1	1			45	36	20	15		55	31	17	10	8	4	1	0	7	3	1	1	7	1	1	1	7	3	1	1	5.3	1.8	0.85	193.8	105	167	166
6	3	1	1			42	33	12	6		52	30	20	10	7	3	2	1	7	3	2	2	7	2	1	1	7	3	1	1	1.05935	0.537484	0.241523	14.1248	101	220	169			3	1	0.5
5	1	1	1			59	24	17	6		91	21	10	6	9	3	1	1	6	1	1	1	6	1	1	1	6	2	0	0					112	135	123			3	1.5	1
6	4	1	1			58	22	15	7		62	39	22	12	8	2	1	1	7	1	1	1	9	3	2	1	6	2	1	1					113	156	136.5			4	2	1
8	3	1	1			57	26	17	9		65	27	22	13	9	3	2	1	6	3	2	1	6	3	1	1	5	1	1	0					114	233	17.8528			3.5	2.5	1
9	2	2	1			62	51	28	15		57	28	21	12	8	3	1	0	7	2	2	2	7	1	2	0	6	1	0	0					110	330				5	1	0.5
6	2	1	1			67	38	19	8		60.25	29.375	18.75	10.25	7.875	2.5625	1.25	0.625	6.9375	2.3125	1.3125	0.9375	8	2	0	0	7	2	1	1					122	171.688				3	1	0.5
8	3	1	1			44	33	22	11		9.49737	4.01456	3.06594	3.94124	0.718795	0.727438	0.447214	0.5	0.771902	0.946485	0.60208	0.57373	7.14286	1.85714	1.14286	0.714286	6.28571	2	0.714286	0.571429					113	52.5518				4.5	2	1
7	2	1	1			67	39	18	10														1.06904	0.899735	0.690066	0.48795	0.755929	0.816497	0.48795	0.534522					114					5	2.5	1
6	1	0	0			48	33	18	6																										90					3.5	1.5	1
7	1	0	0			40	31	17	8																										110					2	1.5	1
8	2	1	1			37	24	12	4																										124					3.65	1.65	0.85
6	1	1	1			51	42	28	12																										122					0.973253	0.579751	0.241523
7	1	1	1			43	37	29	16																										120
8	1	1	1			73	49	36	17																										115
7	4	2	1			50	26	24	17																										85
8	3	2	1			55	40	25	18																										96
8	2	1	1			48	33	24	12																										92
7	1	1	1			59	45	21	12																										89
6	4	2	1			47	32	16	8																										101
7	3	1	1			74	55	35	19																										110
6	1	1	1			58	26	18	8																										120
6	3	1	1			47	25	13	9																										121
7	3	1	1			47	28	19	4																										128
8	4	2	2			52	28	18	10																										108
7	1	1	1			59	27	16	10																										109
8	1	1	1			19	10	5	2																										109
7	2	2	1			57	23	17	9																										117
6	1	1	1			53	24	16	7																										103
7	1	1	0			38	25	13	8																										115
8	2	1	1			19	10	6	2																										90
7	1	0	0			43	22	13	10																										125
7	2	1	1			74	42	25	12																										133
6	1	0	0			55	32	9	4																										115
8	2	1	1			18	15	10	7																										120
8	1	0	0			42	21	8	3																										112
8	2	0	0			62	34	21	17																										126
8	1	1	1			59	32	18	7																										136
7	2	0	0			78	45	20	14																										133
7	2	0	0			40	26	19	9																										130
7	1	0	0			49	19	10	6																										140
0.890913	1.04862	0.582759	0.433861			12.6322	10.0006	6.9437	4.47328																										110.882
																																			13.7472

## Sheet: Sheet3
LDH	1	69		L4/5	2	L5/S1	26	80	130.594	165	170.136	235	244.5	4	percutaneous lumbar discectomy+laminectomy+syndesmectomy	68	percutaneous lumbar discectomy+laminectomy+syndesmectomy	68
LDH	1			L4/5		L5/S1		93	53.1486	155	47.7536	254	13.435	9	percutaneous lumbar discectomy+laminectomy+syndesmectomy	10	percutaneous lumbar discectomy+laminectomy+syndesmectomy
LDH	2			L3/4,L4/5		L5/S1		95		112				7	percutaneous lumbar discectomy+laminectomy+syndesmectomy	3	percutaneous lumbar discectomy+laminectomy+syndesmectomy
LDH	1			L5/S1		L5/S1		90		190				6	percutaneous lumbar discectomy+laminectomy+syndesmectomy	14	percutaneous lumbar discectomy+laminectomy+syndesmectomy
LDH	1			L5/S1		L5/S1		95		200				6	percutaneous lumbar discectomy+laminectomy+syndesmectomy	10	percutaneous lumbar discectomy+laminectomy+syndesmectomy
LDH+spinal stenosis	2			L4/5,L5/S1		L5/S1		102		156				16	percutaneous lumbar discectomy+laminectomy+syndesmectomy		percutaneous lumbar discectomy+laminectomy+syndesmectomy
LDH	1			L5/S1		L5/S1		102		152				10	percutaneous lumbar discectomy+laminectomy+syndesmectomy		percutaneous lumbar discectomy+laminectomy+syndesmectomy
LDH	1			L4/5		L5/S1		100		200				3	percutaneous lumbar discectomy+laminectomy+syndesmectomy		percutaneous lumbar discectomy+laminectomy+syndesmectomy
LDH	1			L4/5		L5/S1		100		136				10	percutaneous lumbar discectomy+laminectomy+syndesmectomy		percutaneous lumbar discectomy+laminectomy+syndesmectomy
LDH	1			L4/5		L5/S1		108		189				12	percutaneous lumbar discectomy+laminectomy+syndesmectomy		percutaneous lumbar discectomy+laminectomy+syndesmectomy
LDH	1			L4/5		L5/S1		105		160				10	percutaneous lumbar discectomy+laminectomy+syndesmectomy		percutaneous lumbar discectomy+laminectomy+syndesmectomy
LDH	2			L2/3,L4/5		L5/S1		101		156				11	percutaneous lumbar discectomy+laminectomy+syndesmectomy		percutaneous lumbar discectomy+laminectomy+syndesmectomy
LDH	2			L4/5,L5/S1		L5/S1		104		135				9	laminectomy+syndesmectomy		percutaneous lumbar discectomy+laminectomy+syndesmectomy
LDH+spinal stenosis	2			L3/4,L4/5		L5/S1		119		125				6	laminectomy+syndesmectomy		percutaneous lumbar discectomy+laminectomy+syndesmectomy
LDH+spinal stenosis	1			L4/5		L5/S1		112		167				6	percutaneous lumbar discectomy+laminectomy+syndesmectomy		percutaneous lumbar discectomy+laminectomy+syndesmectomy
LDH	1			L1/2		L5/S1		113		220				5	percutaneous lumbar discectomy+laminectomy+syndesmectomy		percutaneous lumbar discectomy+laminectomy+syndesmectomy
LDH	1			L4/5		L5/S1		114		135				6	percutaneous lumbar discectomy+laminectomy+syndesmectomy		percutaneous lumbar discectomy+laminectomy+syndesmectomy
LDH	1			L5/S1		L5/S1		110		156				10	laminectomy+syndesmectomy		percutaneous lumbar discectomy+laminectomy+syndesmectomy
LDH	1			L5/S1		L5/S1		122		118				9	percutaneous lumbar discectomy+laminectomy+syndesmectomy+Annulus fibrosus suture		percutaneous lumbar discectomy+laminectomy+syndesmectomy
LDH	1			L5/S1		L5/S1		167		153				5	percutaneous lumbar discectomy+laminectomy+syndesmectomy		percutaneous lumbar discectomy+laminectomy+syndesmectomy
LDH	1			L4/5		L5/S1		111		233				5	percutaneous lumbar discectomy+laminectomy+syndesmectomy		percutaneous lumbar discectomy+laminectomy+syndesmectomy
LDH	1			L5/S1		L5/S1		113		330				5	percutaneous lumbar discectomy+laminectomy+syndesmectomy		percutaneous lumbar discectomy+laminectomy+syndesmectomy
LDH	2			L4/5,L5/S1		L5/S1		114						14	percutaneous lumbar discectomy+laminectomy+syndesmectomy		percutaneous lumbar discectomy+laminectomy+syndesmectomy
LDH	2			L1/2,L5/S1		L5/S1		90						7	percutaneous lumbar discectomy+laminectomy+syndesmectomy		percutaneous lumbar discectomy+laminectomy+syndesmectomy
LDH	1			L4/5		L5/S1		110						9	percutaneous lumbar discectomy+laminectomy+syndesmectomy		percutaneous lumbar discectomy+laminectomy+syndesmectomy
LDH	1			L4/5		L5/S1		124						10	percutaneous lumbar discectomy+laminectomy+syndesmectomy		percutaneous lumbar discectomy+laminectomy+syndesmectomy
LDH+spinal stenosis	3			L3/4,L4/5,L5/S1				260						9	percutaneous lumbar discectomy+laminectomy+syndesmectomy		percutaneous lumbar discectomy+laminectomy+syndesmectomy
LDH+spinal stenosis	2			L3/4,L4/5				120						12	laminectomy+syndesmectomy		percutaneous lumbar discectomy+laminectomy+syndesmectomy
LDH+spinal stenosis	1			L5/S1				165						13	laminectomy+syndesmectomy		percutaneous lumbar discectomy+laminectomy+syndesmectomy
LDH	1			L5/S1				85						4	laminectomy+syndesmectomy		percutaneous lumbar discectomy+laminectomy+syndesmectomy
LDH	1			L4/5				96						9	percutaneous lumbar discectomy+laminectomy+syndesmectomy		percutaneous lumbar discectomy+laminectomy+syndesmectomy
LDH	2			L3/4,L4/5				92						6	percutaneous lumbar discectomy+laminectomy+syndesmectomy		percutaneous lumbar discectomy+laminectomy+syndesmectomy
LDH	1			L4/5				89						5	percutaneous lumbar discectomy+laminectomy+syndesmectomy		percutaneous lumbar discectomy+laminectomy+syndesmectomy
LDH	1			L5/S1				110						11	percutaneous lumbar discectomy+laminectomy+syndesmectomy		percutaneous lumbar discectomy+laminectomy+syndesmectomy
LDH	1			L5/S1				101						26	UBE-PLIF+discectomy		percutaneous lumbar discectomy+laminectomy+syndesmectomy
LDH	1			L4/5				113						21	percutaneous lumbar discectomy+laminectomy+syndesmectomy		percutaneous lumbar discectomy+laminectomy+syndesmectomy
LDH	2			L4/5,L5/S1				112						11	percutaneous lumbar discectomy+laminectomy+syndesmectomy		percutaneous lumbar discectomy+laminectomy+syndesmectomy
LDH	1			L4/5				102						9	percutaneous lumbar discectomy+laminectomy+syndesmectomy		percutaneous lumbar discectomy+laminectomy+syndesmectomy
LDH	1			L5/S1				110						12	percutaneous lumbar discectomy+laminectomy+syndesmectomy		percutaneous lumbar discectomy+laminectomy+syndesmectomy
LDH+spinal stenosis	1			L5/S1				120						6	percutaneous lumbar discectomy+laminectomy+syndesmectomy		percutaneous lumbar discectomy+laminectomy+syndesmectomy
LDH	1			L4/5				121						10	percutaneous lumbar discectomy+laminectomy+syndesmectomy		percutaneous lumbar discectomy+laminectomy+syndesmectomy
LDH+spinal stenosis	1			L4/5				102						14	percutaneous lumbar discectomy+laminectomy+syndesmectomy		percutaneous lumbar discectomy+laminectomy+syndesmectomy
LDH+spinal stenosis	1			L4/5				128						7	percutaneous lumbar discectomy+laminectomy+syndesmectomy		percutaneous lumbar discectomy+laminectomy+syndesmectomy
LDH	1			L4/5				100						5	percutaneous lumbar discectomy+laminectomy+syndesmectomy		percutaneous lumbar discectomy+laminectomy+syndesmectomy
LDH	1			L4/5				108						5	percutaneous lumbar discectomy+laminectomy+syndesmectomy		percutaneous lumbar discectomy+laminectomy+syndesmectomy
LDH	2			L4/5,L5/S1				109						12	percutaneous lumbar discectomy+laminectomy+syndesmectomy+Annulus fibrosus suture		percutaneous lumbar discectomy+laminectomy+syndesmectomy
LDH	2			L4/5,L5/S1				109						16	percutaneous lumbar discectomy+laminectomy+syndesmectomy		percutaneous lumbar discectomy+laminectomy+syndesmectomy
LDH	2			L3/4,L4/5				115						14	percutaneous lumbar discectomy+laminectomy+syndesmectomy		percutaneous lumbar discectomy+laminectomy+syndesmectomy
LDH	1			L5/S1				115						10	laminectomy+syndesmectomy		percutaneous lumbar discectomy+laminectomy+syndesmectomy
LDH+spinal stenosis	2			L3/4,L4/5				166						20	percutaneous lumbar discectomy+laminectomy+syndesmectomy		percutaneous lumbar discectomy+laminectomy+syndesmectomy
LDH+spinal stenosis	1			L5/S1				109						5	percutaneous lumbar discectomy+laminectomy+syndesmectomy		percutaneous lumbar discectomy+laminectomy+syndesmectomy
LDH+spinal stenosis	1			L4/5				121						4	percutaneous lumbar discectomy+laminectomy+syndesmectomy+Annulus fibrosus suture		percutaneous lumbar discectomy+laminectomy+syndesmectomy
LDH	2			L3/4,L4/5				156						6	laminectomy+syndesmectomy		percutaneous lumbar discectomy+laminectomy+syndesmectomy
LDH	1			L4/5				343						14	percutaneous lumbar discectomy+laminectomy+syndesmectomy		percutaneous lumbar discectomy+laminectomy+syndesmectomy
LDH	1			L5/S1				143						30	laminectomy+syndesmectomy		percutaneous lumbar discectomy+laminectomy+syndesmectomy
LDH	1			L4/5				115						10	percutaneous lumbar discectomy+laminectomy+syndesmectomy		percutaneous lumbar discectomy+laminectomy+syndesmectomy
LDH	2			L3/4,L4/5				90						6	percutaneous cervical discectomy+laminectomy+syndesmectomy		percutaneous lumbar discectomy+laminectomy+syndesmectomy
LDH+spinal stenosis	1			L5/S1				167						12	percutaneous lumbar discectomy+laminectomy+syndesmectomy		percutaneous lumbar discectomy+laminectomy+syndesmectomy
LDH	2			L4/5,L5/S1				180						15	percutaneous lumbar discectomy+laminectomy+syndesmectomy		percutaneous lumbar discectomy+laminectomy+syndesmectomy
LDH	3			L3/4,L4/5,L5/S1				145						22	percutaneous lumbar discectomy+laminectomy+syndesmectomy		percutaneous lumbar discectomy+laminectomy+syndesmectomy
LDH	1			L4/5				115						14	percutaneous lumbar discectomy+laminectomy+syndesmectomy		percutaneous lumbar discectomy+laminectomy+syndesmectomy
LDH	2			L3/4,L4/5				120						11	laminectomy+syndesmectomy		percutaneous lumbar discectomy+laminectomy+syndesmectomy
LDH	1			L5/S1				236						16	percutaneous lumbar discectomy+laminectomy+syndesmectomy+Annulus fibrosus suture		percutaneous lumbar discectomy+laminectomy+syndesmectomy
LDH	1			L4/5				270						29	percutaneous lumbar discectomy+laminectomy+syndesmectomy		percutaneous lumbar discectomy+laminectomy+syndesmectomy
LDH	2			L4/5,L5/S1				176						19	percutaneous lumbar discectomy+laminectomy+syndesmectomy		percutaneous lumbar discectomy+laminectomy+syndesmectomy
LDH	1			L5/S1				123						21	percutaneous lumbar discectomy+laminectomy+syndesmectomy+Annulus fibrosus suture		percutaneous lumbar discectomy+laminectomy+syndesmectomy
LDH	1			L5/S1				180						10	UBE-PLIF+discectomy		percutaneous lumbar discectomy+laminectomy+syndesmectomy
LDH	2			L4/5,L5/S1				280						57	laminectomy+syndesmectomy		percutaneous lumbar discectomy+laminectomy+syndesmectomy
LDH	1			L4/5				300						16	percutaneous lumbar discectomy+laminectomy+syndesmectomy
LDH	1			L4/5											percutaneous lumbar discectomy+laminectomy+syndesmectomy
LDH	1			L2/3											laminectomy+syndesmectomy
LDH	1			L4/5											percutaneous lumbar discectomy+laminectomy+syndesmectomy+Annulus fibrosus suture
LDH	1			L4/5											percutaneous lumbar discectomy+laminectomy+syndesmectomy+Annulus fibrosus suture
LDH	1			L3/4											laminectomy+syndesmectomy
LDH	1			L4/5											percutaneous lumbar discectomy+laminectomy+syndesmectomy+Annulus fibrosus suture
LDH	1			L4/5											percutaneous lumbar discectomy+laminectomy+syndesmectomy
LDH	1			L4/5											laminectomy+syndesmectomy
LDH	2			L3/4,L4/5											UBE-PLIF+discectomy
LDH	1			L4/5											percutaneous lumbar discectomy+laminectomy+syndesmectomy
LDH	1			L4/5											UBE-PLIF+discectomy
LDH	1			L5/S1											percutaneous lumbar discectomy+laminectomy+syndesmectomy
LDH	1			L5/S1											percutaneous lumbar discectomy+laminectomy+syndesmectomy
LDH	1			L5/S1											UBE-PLIF+discectomy
LDH	1			L5/S1											percutaneous lumbar discectomy+laminectomy+syndesmectomy
LDH	2			L4/5,L5/S1											percutaneous lumbar discectomy+laminectomy+syndesmectomy
LDH	1			L5/S1											percutaneous lumbar discectomy+laminectomy+syndesmectomy
LDH	1			L3/4											percutaneous lumbar discectomy+laminectomy+syndesmectomy+Annulus fibrosus suture
LDH	1			L4/5											percutaneous lumbar discectomy+laminectomy+syndesmectomy
LDH	1			L4/5											percutaneous lumbar discectomy+laminectomy+syndesmectomy
LDH	1			L5/S1											percutaneous lumbar discectomy+laminectomy+syndesmectomy
	1			L4/5											percutaneous cervical discectomy+laminectomy+syndesmectomy
	1			L4/5											percutaneous lumbar discectomy+laminectomy+syndesmectomy
	1			L4/5											percutaneous lumbar discectomy+laminectomy+syndesmectomy
															percutaneous lumbar discectomy+laminectomy+syndesmectomy
															percutaneous cervical discectomy+laminectomy+syndesmectomy
															percutaneous lumbar discectomy+laminectomy+syndesmectomy
															UBE-PLIF+discectomy
															percutaneous lumbar discectomy+laminectomy+syndesmectomy+Annulus fibrosus suture
															UBE-PLIF+discectomy
															UBE-PLIF+discectomy
															percutaneous lumbar discectomy+laminectomy+syndesmectomy
															percutaneous lumbar discectomy+laminectomy+syndesmectomy
															percutaneous lumbar discectomy+laminectomy+syndesmectomy
															UBE-PLIF+discectomy
															UBE-PLIF+discectomy

## Sheet: Sheet2
Surgical method	Surgical time(min)
percutaneous lumbar discectomy+laminectomy+syndesmectomy	80
percutaneous lumbar discectomy+laminectomy+syndesmectomy	93
percutaneous lumbar discectomy+laminectomy+syndesmectomy	95
percutaneous lumbar discectomy+laminectomy+syndesmectomy	100
percutaneous lumbar discectomy+laminectomy+syndesmectomy	100
percutaneous lumbar discectomy+laminectomy+syndesmectomy	122
percutaneous lumbar discectomy+laminectomy+syndesmectomy	102
percutaneous lumbar discectomy+laminectomy+syndesmectomy	117
percutaneous lumbar discectomy+laminectomy+syndesmectomy	100
percutaneous lumbar discectomy+laminectomy+syndesmectomy	108
percutaneous lumbar discectomy+laminectomy+syndesmectomy	105
percutaneous lumbar discectomy+laminectomy+syndesmectomy	101
laminectomy+syndesmectomy	104
percutaneous lumbar discectomy+laminectomy+syndesmectomy+Annulus fibrosus suture	136
percutaneous lumbar discectomy+laminectomy+syndesmectomy	112
percutaneous lumbar discectomy+laminectomy+syndesmectomy	113
percutaneous lumbar discectomy+laminectomy+syndesmectomy	114
percutaneous lumbar discectomy+laminectomy+syndesmectomy	110
percutaneous lumbar discectomy+laminectomy+syndesmectomy	122
laminectomy+syndesmectomy	167
laminectomy+syndesmectomy	111
percutaneous lumbar discectomy+laminectomy+syndesmectomy	113
percutaneous lumbar discectomy+laminectomy+syndesmectomy	114
percutaneous lumbar discectomy+laminectomy+syndesmectomy	90
percutaneous lumbar discectomy+laminectomy+syndesmectomy	110
percutaneous lumbar discectomy+laminectomy+syndesmectomy	124
percutaneous lumbar discectomy+laminectomy+syndesmectomy	260
percutaneous lumbar discectomy+laminectomy+syndesmectomy	120
percutaneous lumbar discectomy+laminectomy+syndesmectomy	165
percutaneous lumbar discectomy+laminectomy+syndesmectomy	85
percutaneous lumbar discectomy+laminectomy+syndesmectomy	96
percutaneous lumbar discectomy+laminectomy+syndesmectomy	92
percutaneous lumbar discectomy+laminectomy+syndesmectomy	89
percutaneous lumbar discectomy+laminectomy+syndesmectomy+Annulus fibrosus suture	110
percutaneous lumbar discectomy+laminectomy+syndesmectomy	101
percutaneous lumbar discectomy+laminectomy+syndesmectomy+Annulus fibrosus suture	113
laminectomy+syndesmectomy	112
laminectomy+syndesmectomy	102
percutaneous lumbar discectomy+laminectomy+syndesmectomy	110
percutaneous lumbar discectomy+laminectomy+syndesmectomy	120
percutaneous lumbar discectomy+laminectomy+syndesmectomy	121
percutaneous lumbar discectomy+laminectomy+syndesmectomy+Annulus fibrosus suture	102
percutaneous lumbar discectomy+laminectomy+syndesmectomy	128
percutaneous lumbar discectomy+laminectomy+syndesmectomy+Annulus fibrosus suture	100
percutaneous lumbar discectomy+laminectomy+syndesmectomy	108
percutaneous lumbar discectomy+laminectomy+syndesmectomy	109
percutaneous lumbar discectomy+laminectomy+syndesmectomy+Annulus fibrosus suture	109
percutaneous lumbar discectomy+laminectomy+syndesmectomy+Annulus fibrosus suture	115
laminectomy+syndesmectomy	115
percutaneous lumbar discectomy+laminectomy+syndesmectomy+Annulus fibrosus suture	166
percutaneous lumbar discectomy+laminectomy+syndesmectomy	109
laminectomy+syndesmectomy	121
percutaneous lumbar discectomy+laminectomy+syndesmectomy	156
UBE-PLIF+discectomy	343
percutaneous lumbar discectomy+laminectomy+syndesmectomy	143
percutaneous lumbar discectomy+laminectomy+syndesmectomy	115
percutaneous lumbar discectomy+laminectomy+syndesmectomy	90
percutaneous lumbar discectomy+laminectomy+syndesmectomy	167
percutaneous lumbar discectomy+laminectomy+syndesmectomy+Annulus fibrosus suture	180
percutaneous lumbar discectomy+laminectomy+syndesmectomy	145
percutaneous lumbar discectomy+laminectomy+syndesmectomy	115
percutaneous lumbar discectomy+laminectomy+syndesmectomy	120
percutaneous lumbar discectomy+laminectomy+syndesmectomy	236
percutaneous lumbar discectomy+laminectomy+syndesmectomy	270
percutaneous lumbar discectomy+laminectomy+syndesmectomy	176
percutaneous lumbar discectomy+laminectomy+syndesmectomy+Annulus fibrosus suture	123
percutaneous lumbar discectomy+laminectomy+syndesmectomy	180
percutaneous lumbar discectomy+laminectomy+syndesmectomy	280
percutaneous lumbar discectomy+laminectomy+syndesmectomy	300
	LS	PLS-L	PLSA	UBE-PLIFD		LS	PLS-L	PLSA						Surgical method	Surgical time(min)
	117.95	131.594	131.943	343		104	80	136						percutaneous lumbar discectomy+laminectomy+syndesmectomy	165
	29.3607	52.7721	48.8347			167	93	110						percutaneous lumbar discectomy+laminectomy+syndesmectomy	155
						111	95	113						percutaneous lumbar discectomy+laminectomy+syndesmectomy	112
						112	100	102						laminectomy+syndesmectomy	190
						102	100	100						laminectomy+syndesmectomy	200
						115	122	109						percutaneous lumbar discectomy+laminectomy+syndesmectomy	156
						121	102	115						percutaneous lumbar discectomy+laminectomy+syndesmectomy	152
							117	166						laminectomy+syndesmectomy	200
							100	180						percutaneous lumbar discectomy+laminectomy+syndesmectomy	136
							108	123						percutaneous lumbar discectomy+laminectomy+syndesmectomy	189
							105							percutaneous lumbar discectomy+laminectomy+syndesmectomy	160
							101							percutaneous lumbar discectomy+laminectomy+syndesmectomy	156
							112							laminectomy+syndesmectomy	135
							113							percutaneous lumbar discectomy+laminectomy+syndesmectomy	125
							114							percutaneous lumbar discectomy+laminectomy+syndesmectomy	167
							110							percutaneous lumbar discectomy+laminectomy+syndesmectomy	220
							122							percutaneous lumbar discectomy+laminectomy+syndesmectomy	135
							113							percutaneous lumbar discectomy+laminectomy+syndesmectomy	156
							114							laminectomy+syndesmectomy	118
							90							laminectomy+syndesmectomy	153
							110							percutaneous lumbar discectomy+laminectomy+syndesmectomy	233
							124							percutaneous lumbar discectomy+laminectomy+syndesmectomy	330
							260
							120
							165							LS	PLS-L
							85							190	165
							96							200	155
							92							200	112
							89							135	156
							101							118	152
							110							153	136
							120								189
							121								160
							128								156
							108								125
							109								167
							109								220
							156								135
							143								156
							115								233
							90								330
							167
							145
							115
							120
							236
							270
							176
							180
							280
							300
